# Supplementary material for: Ru4+ induced colossal magnetoimpedance in Ru doped perovskite manganite at room temperature
Source: Royal Society of Chemistry journal article supplement (doi:10.1039/c6cp01224h), 2016-01-01
Supplement: c6cp01224h1.pdf [file c6cp01224h1.pdf]

## Supplementary Material for

# “Ru<sup>+4</sup> induced colossal magnetoimpedance in Ru doped perovskite manganite at room temperature”

Brajendra singh<sup>a</sup>

<sup>a</sup> Centre of Material Sciences, University of Allahabad, Allahabad – 211002, India

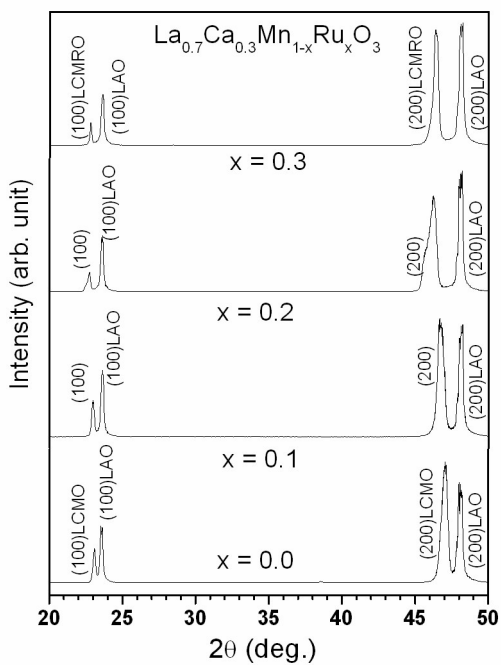

Figure S1: X- ray diffraction patterns of Pulsed Laser deposited  $\text{La}_{0.7}\text{Ca}_{0.3}\text{Mn}_{1-x}\text{Ru}_x\text{O}_3$  thin films grown on  $\text{LaAlO}_3$  (100) substrate

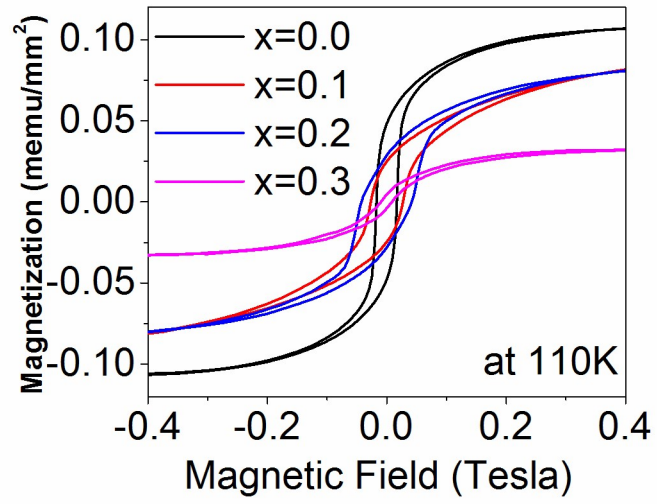

Figure S2: Magnetization vs magnetic field curve shows the hysteretic behaviour of Ru doped  $\text{La}_{0.7}\text{Ca}_{0.3}\text{Mn}_{1-x}\text{Ru}_x\text{O}_3$  ( $0 \leq x \leq 0.3$ ) thin films at 110 K
